# Supplementary material for: Invasiveness of Escherichia coli Is Associated with an IncFII Plasmid
Source: MDPI journal article supplement (doi:10.3390/pathogens10121645), 2021-12-20
Supplement: s1 [file s1]

**Supplementary Materials:** The following are available online at [www.mdpi.com/xxx/s1](http://www.mdpi.com/xxx/s1), Table S1: Patient characteristics; Figure S1: Comparison virulome of the *E. coli* strains from P1 (Eco\_b1, Eco\_r1), J53 and J53 after plasmid transfer (J53pEco\_b1); Figure S2: Content of the IncFII\_1 plasmid reconstructed by comparison of the genetic content of Eco\_b1 and Eco\_b1cured.

|           | age (years) | gender |
|-----------|-------------|--------|
| <i>P1</i> | 60          | female |
| <i>P2</i> | 28          | female |
| <i>P3</i> | 71          | female |
| <i>P4</i> | 71          | male   |
| <i>P5</i> | 64          | male   |

**Table S1.** Patient characteristics.

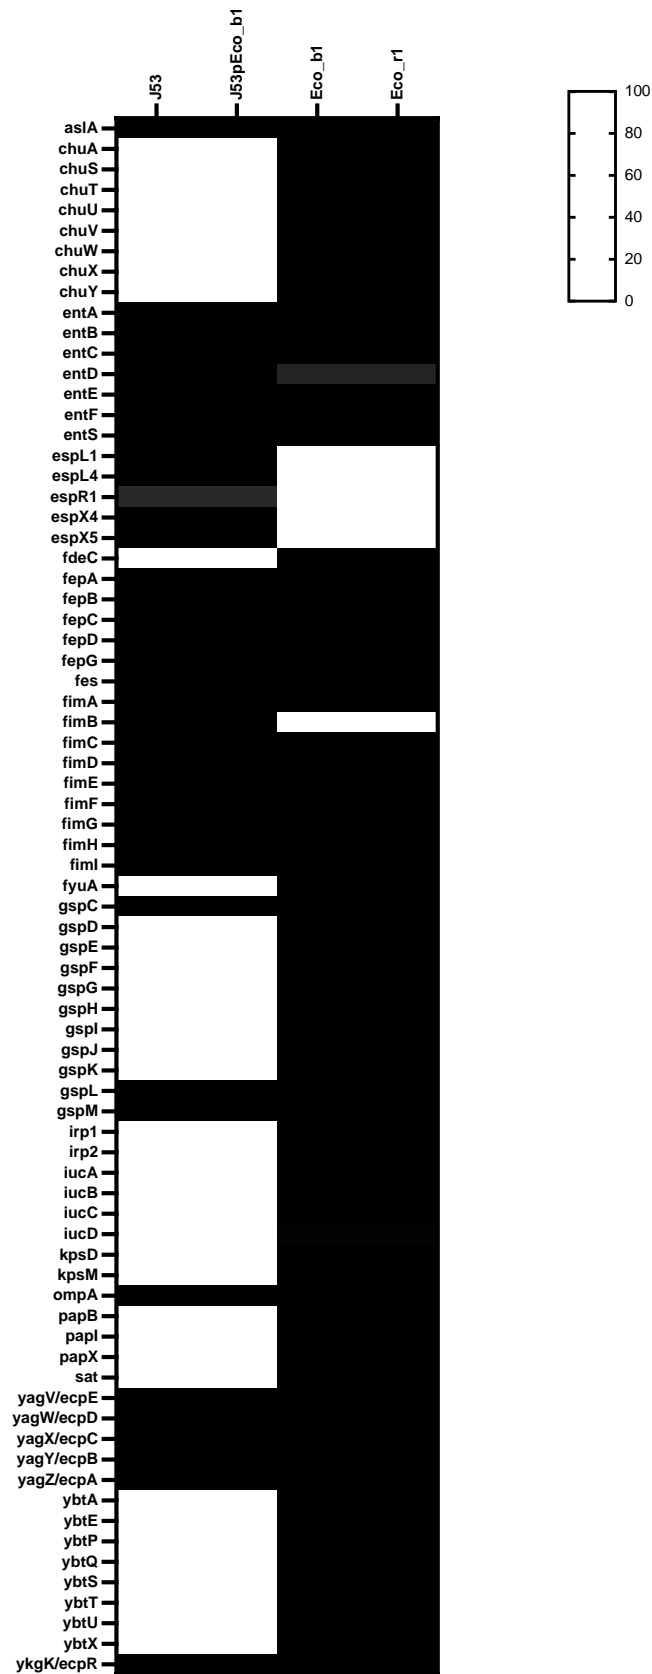

Figure S1. Comparison virulome of the *E. coli* strains from P1 (Eco\_b1, Eco\_r1), J53 and J53 after plasmid transfer (J53pEco\_b1).

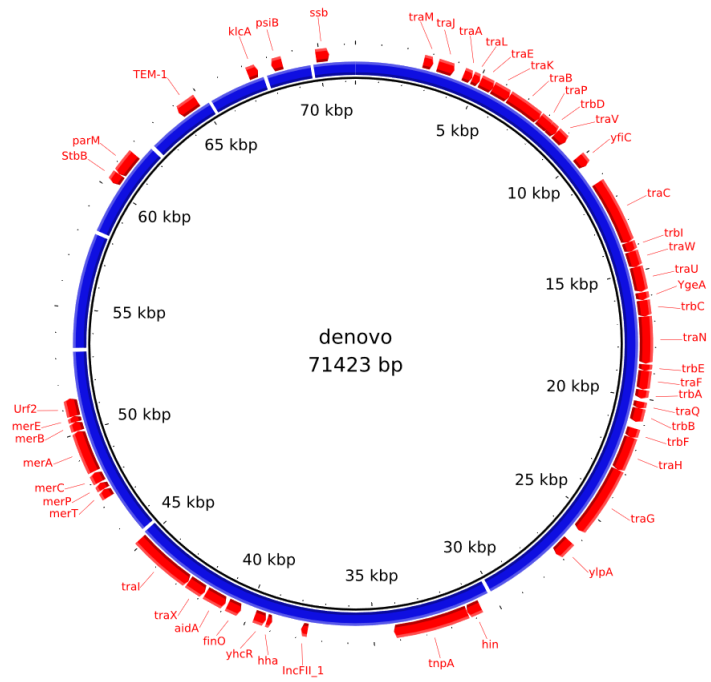

**Figure S2.** Content of the IncFII\_1 plasmid reconstructed by comparison of the genetic content of Eco\_b1 and Eco\_b1cured. Each contigs absent from Eco\_b1cured were concatenated to evaluate the plasmid content.
